# Supplementary material
Source: PubMed Central journal article supplement (PMC10564509)

985 **Supplementary Figure 1:  $\Delta 9$ -THC induces ESCs proliferation for as low as 1nM.**

986 **(A)** Whisker boxplot indicating the median cellular viability of ESCs exposed to the different  $\Delta 9$ -THC doses  
987 and associated errors. **(B)** Whisker boxplot indicating the median number of viable cells exposed to the  
988 different  $\Delta 9$ -THC doses indicated and associated errors. At least three independent biological repeats with  
989 three technical replicates (N=3, n=3). Statistical significance: \*(p<0.05), \*\*\*(p<0.001), \*\*\*\*(p<0.0001).

990

991 **Supplementary Figure 2:  $\Delta 9$ -THC induces alteration in ESCs cell cycle.**

992 **(A)** Representative flow contour plots showing distribution of BrdU-stained and DAPI-stained cells,  
993 exposed to the different doses of  $\Delta 9$ -THC indicated. The frequency of events in each gate is indicated. **(B)**  
994 The median percentage of events and associated errors for each cell cycle gate were plotted in histograms.  
995 At least three independent biological repeats with three technical replicates (N=3, n=3). Statistical  
996 significance: \*(p<0.05), \*\*(p<0.01).

997

998 **Supplementary Figure 3:  $\Delta 9$ -THC exposure in male ESCs also provokes cell proliferation.**

999 **(A)** Whisker boxplot indicating the median cellular viability of male ESCs (the R8 cell line, see Material and  
1000 Methods section) exposed to the different  $\Delta 9$ -THC doses and associated errors. **(B)** Whisker boxplot  
1001 indicating the median number of viable cells exposed to the different  $\Delta 9$ -THC doses indicated and  
1002 associated errors. At least three independent biological repeats with three technical replicates (N=3, n=3).  
1003 Statistical significance: \*(p<0.05), \*\*(p<0.01), \*\*\*\*(p<0.0001).

1004

1005 **Supplementary Figure 4: hESCs cell number decreases upon  $\Delta 9$ -THC exposure.**

1006 **(A)** Whisker boxplot indicating the median cellular viability of human embryonic stem cells continuously  
1007 exposed to 100nM  $\Delta 9$ -THC doses over 6 days and associated errors. **(B)** Whisker boxplot indicating the  
1008 median number of viable cells exposed to 100nM of  $\Delta 9$ -THC doses indicated and associated errors. For (A  
1009 and B), 6 technical repeats of 2 biological repeats (n=12) were plotted. Statistical significance: \*\*(p<0.01).

1010

1011 **Supplementary Figure 5: hESCs metabolism is slightly but significantly impacted by  $\Delta 9$ -THC exposure.**

1012 The NAD(P)<sup>+</sup>/NADPH ratio of hESCs exposed to 100nM of  $\Delta 9$ -THC was normalized to the one measured in  
1013 the mock-treated condition. Median and associated errors were plotted in whisker boxplots. One  
1014 representative experiment out of two independent experiments was used to plot results. Statistical  
1015 significance: \*(p<0.05).

1016

1017 **Supplementary Figure 6: Extracellular acidification rates and oxygen consumption rates in ESCs and**  
1018 **EpiLCs upon  $\Delta 9$ -THC exposure.**

1019 **(A and B)** Traces were plotted for the extracellular acidification rate (ECAR) measurements in ESCs and  
1020 EpiLCs, respectively, exposed to the different  $\Delta 9$ -THC doses indicated and normalized to the protein  
1021 content. The oligomycin injection time is indicated by an arrow and allows to differentiate basal glycolytic  
1022 rate from maximal glycolytic rate (when mitochondria are inhibited). The datapoints used in the main  
1023 figure correspond to the first timepoint in the maximal glycolytic capacity section. **(C and D)** Traces were  
1024 plotted for the oxygen consumption rate (OCR) measurements in ESCs and EpiLCs, respectively, exposed  
1025 to the different  $\Delta 9$ -THC doses indicated and normalized to the protein content. The oligomycin, FCCP and  
1026 AntimycinA/Rotenone injection times are indicated by arrows and allow to differentiate basal respiration  
1027 from ATP-coupled respiration and maximal respiratory capacity. The datapoints used in the main figure  
1028 correspond to the second timepoint in the maximal respiratory capacity section. FCCP: Carbonyl cyanide-  
1029 p-trifluoromethoxyphenylhydrazone. Statistical significance: \*(p<0.05), \*\*(p<0.01), \*\*\*\*(p<0.0001).

1030

1031 **Supplementary Figure 7: Metabolite profiling in ESCs and EpiLCs upon  $\Delta 9$ -THC exposure.**

1032 **(A and B)** Heatmaps showing the log<sub>2</sub> of the amount of each metabolite upregulated in ESCs and EpiLCs  
1033 upon exposure to 100nM of  $\Delta 9$ -THC. The relative amounts of metabolites were normalized to the mean  
1034 value across all samples for one same condition and to the number of viable cells harvested in parallel on  
1035 a control plate. **(C)** Histograms showing the ratio of reduced to oxidized glutathione (GSH/GSSG) based on  
1036 the amounts measured in the metabolomics profiling.

1037

1038 **Supplementary Figure 8: Extracellular acidification rates and oxygen consumption rates in ESCs upon**  
1039  **$\Delta 9$ -THC and 2-DG exposure.**

1040 **(A)** Traces were plotted for the extracellular acidification rate (ECAR) measurements in ESCs exposed to  
1041 100nM of  $\Delta 9$ -THC and 10mM of 2-DG, as indicated, and normalized to the protein content. The oligomycin  
1042 injection time is indicated by an arrow and allows to differentiate basal glycolytic rate from maximal  
1043 glycolytic rate (when mitochondria are inhibited). **(B)** Traces were plotted for the oxygen consumption  
1044 rate (OCR) measurements in ESCs exposed to 100nM of  $\Delta 9$ -THC and 10mM of 2-DG, as indicated, and  
1045 normalized to the protein content. The oligomycin, FCCP and AntimycinA/Rotenone injection times are  
1046 indicated by arrows and allow to differentiate basal respiration from ATP-coupled respiration and maximal  
1047 respiratory capacity. FCCP: Carbonyl cyanide-p-trifluoromethoxyphenylhydrazone. Statistical significance:  
1048 \*(p<0.05), \*\*(p<0.01).

1049 **Supplementary Figure 9:  $\Delta 9$ -THC exposure does not alter markers of pluripotency.**

1050 Gene expression profiles of markers for the inner cell mass (ICM) and epiblast. Histograms show the  
1051 median and associated errors of normalized gene counts in each condition, as indicated.

1052

1053 **Supplementary Figure 10:  $\Delta 9$ -THC exposure alter the expression of some epigenetic modifiers.**

1054 Histograms show the median and associated errors of normalized gene counts in each condition, as  
1055 indicated. Only genes with  $|\log_2(\text{FC})| > 0.25$  and  $p\text{-value} < 0.01$  from Supplementary Table 1 were plotted.  
1056 Statistical significance:  $** (p < 0.01)$ ,  $*** (p < 0.001)$ ,  $**** (p < 0.0001)$ .

1057

1058 **Supplementary Figure 11: PGCLCs gating and sorting strategy.**

1059 **(A)** Representative flow contour plots showing distribution of events and gating based on embryoid bodies  
1060 dissociation. **(B and C)** Representative flow contour plots to isolate singlets based on width to height ratios  
1061 on the side scatter and front scatter, respectively. **(D)** Gating strategy for Stella:CFP versus Blimp1:mVenus  
1062 on the negative control, corresponding to embryoid bodies obtained in an induction medium without  
1063 cytokines and BMPs (GK15 only). **(E)** Gating strategy for Stella:CFP versus Blimp1:mVenus on mock-treated  
1064 cells, corresponding to embryoid bodies obtained in an induction medium complemented with cytokines  
1065 and BMPs. DN: double negative, SP: single positive, DP: double positive subpopulations.

1066 **Supplementary Figure 12: Male PGCLCs deriving from ESCs and EpiLCs exposed to 100nM of  $\Delta 9$ -THC  
1067 proliferate.**

1068 **(A)** Diagram illustrating  $\Delta 9$ -THC exposure scheme and experimental strategy. **(B)** Representative flow  
1069 contour plots showing distribution of live-gated events, gating strategy for Stella:CFP versus  
1070 Blimp1:mVenus and percentages of cells in each subpopulations for ESCs and EpiLCs exposed to 100nM of  
1071  $\Delta 9$ -THC. DN: double negative, SP: single positive, DP: double positive subpopulations. **(C)** The percentage  
1072 of events in the gates associated to each subpopulation was normalized to the one measured in the mock-  
1073 treated condition. Median and associated errors were plotted in whisker boxplots independently for each  
1074 subpopulation. At least three independent biological repeats with three technical replicates ( $N=3$ ,  $n=3$ ).  
1075 Statistical significance:  $*(p < 0.05)$ .

1076

1077 **Supplementary Figure 13: No residual  $\Delta 9$ -THC is detected in day 5 embryoid bodies.**

1078 Intracellular levels of  $\Delta 9$ -THC were quantified by mass spectrometry in EpiLCs on the day of aggregate  
1079 formation and in day 5 embryoid bodies (referred as to “EpiLCs” and “PGCLCs”). Histograms show the  
1080 median and associated errors of two independent quantifications. Statistical significance:

1081  $**** (p < 0.0001)$ .

1082

**A.**

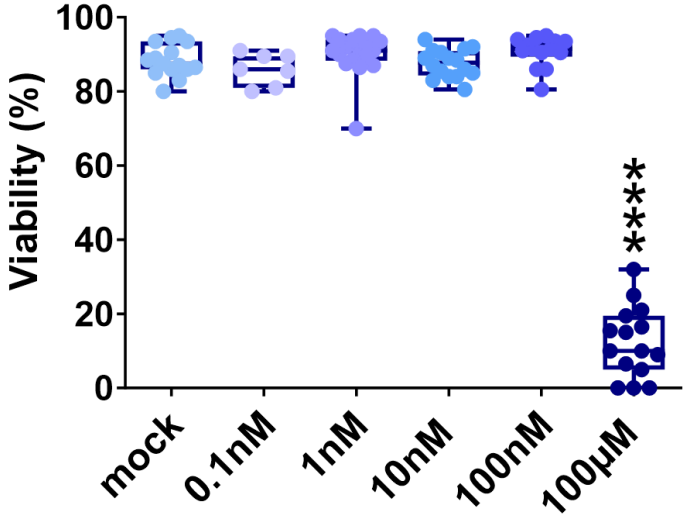

**B.**

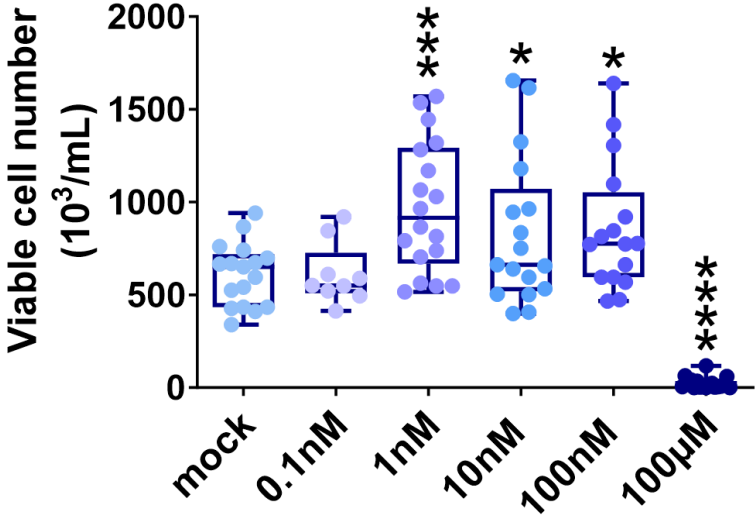

**A.**

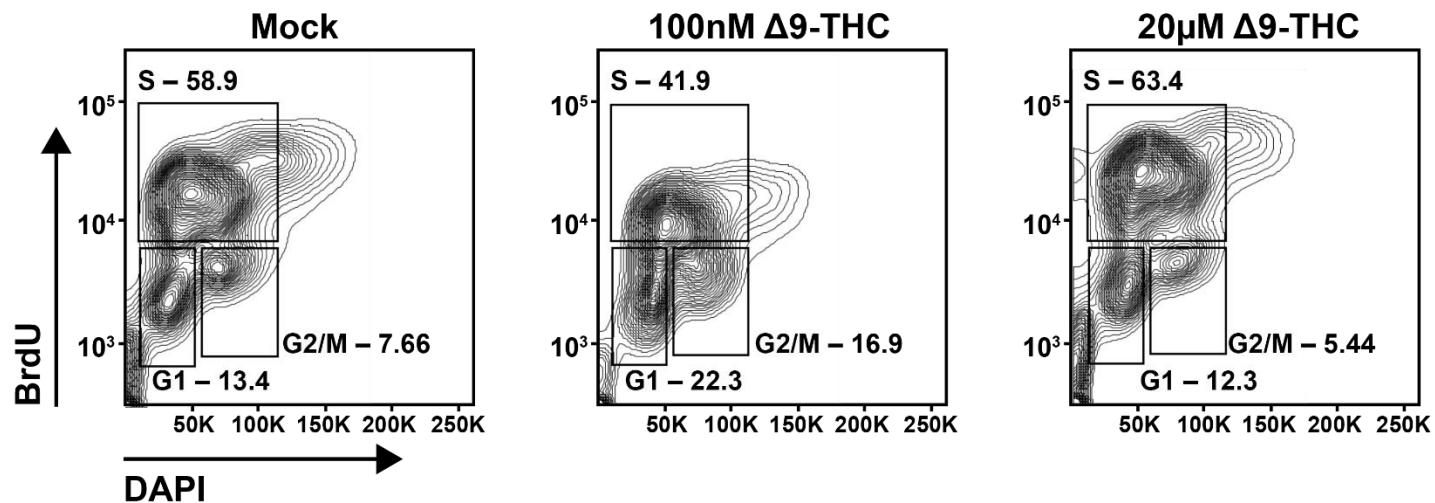

**B.**

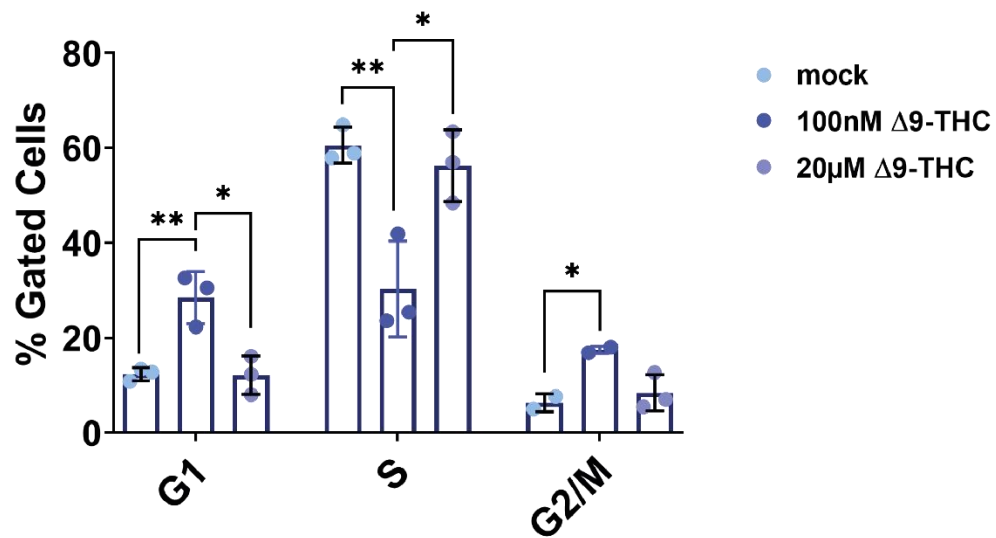

**A.**

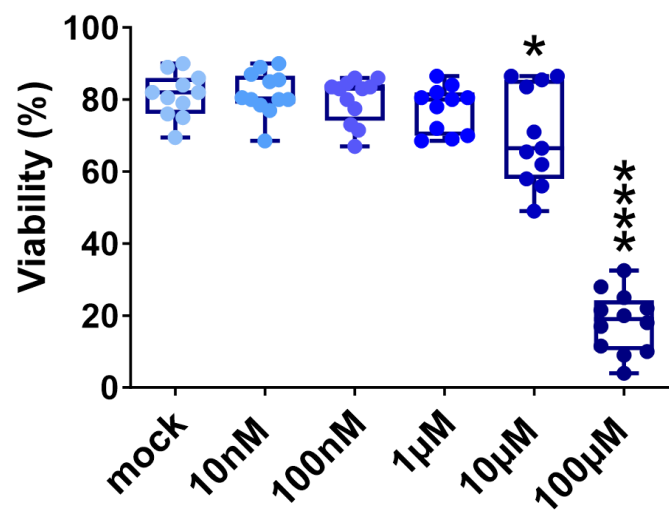

**B.**

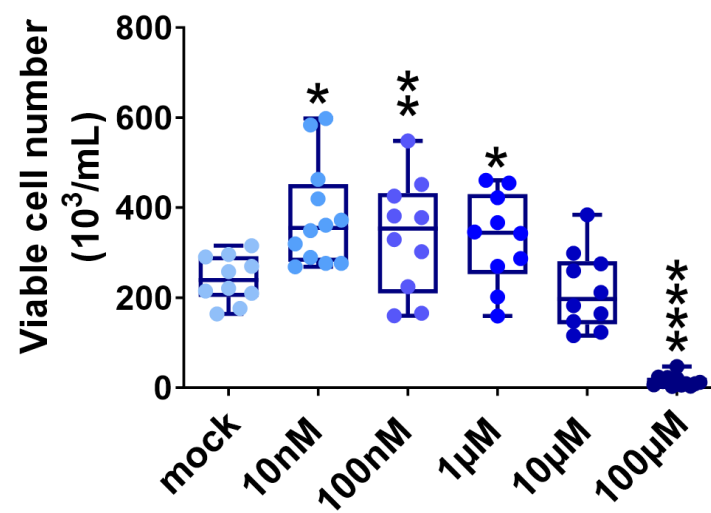

**A.**

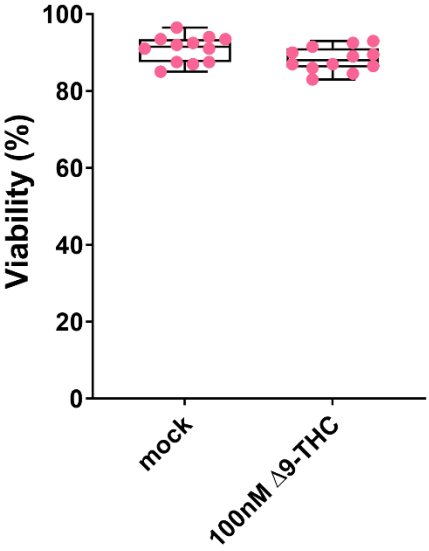

**B.**

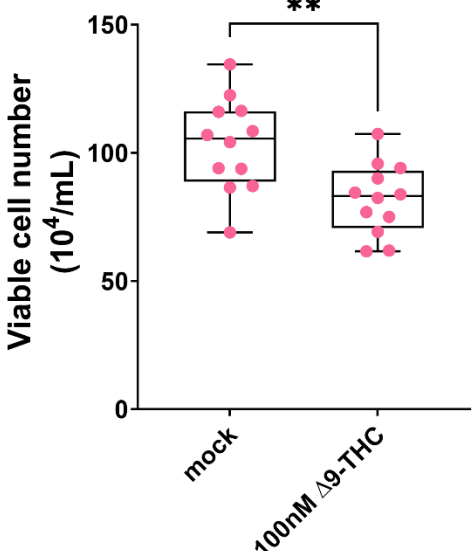

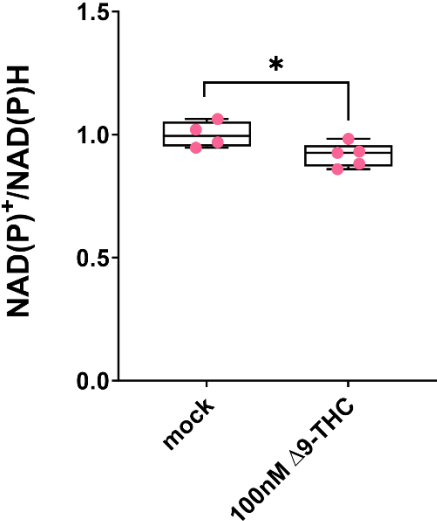



**A.**

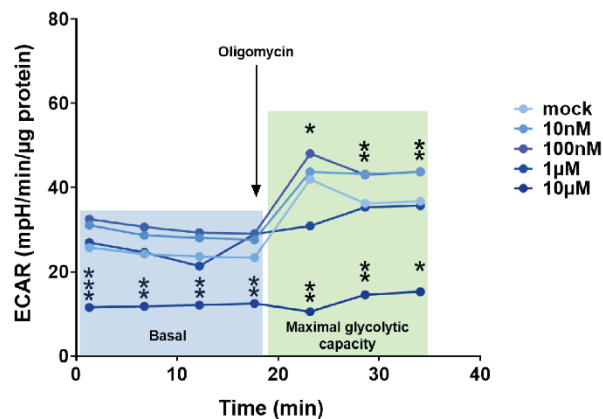

**B.**

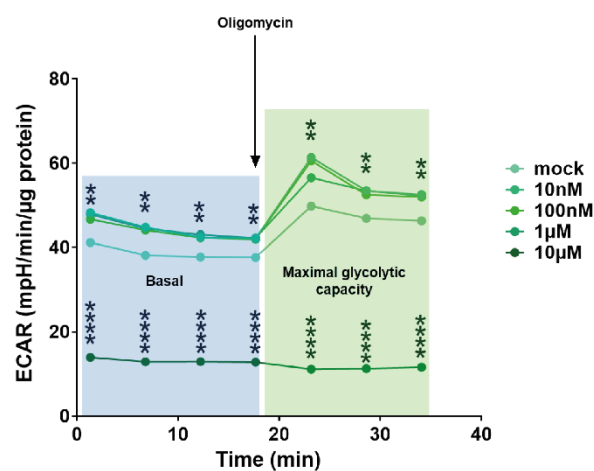

**C.**

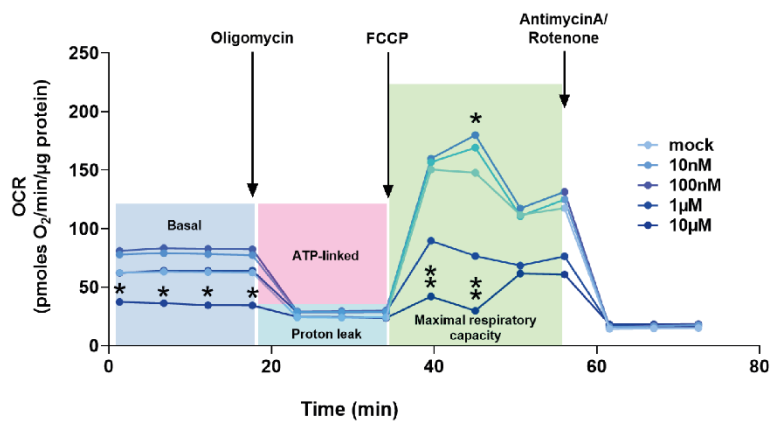

**D.**

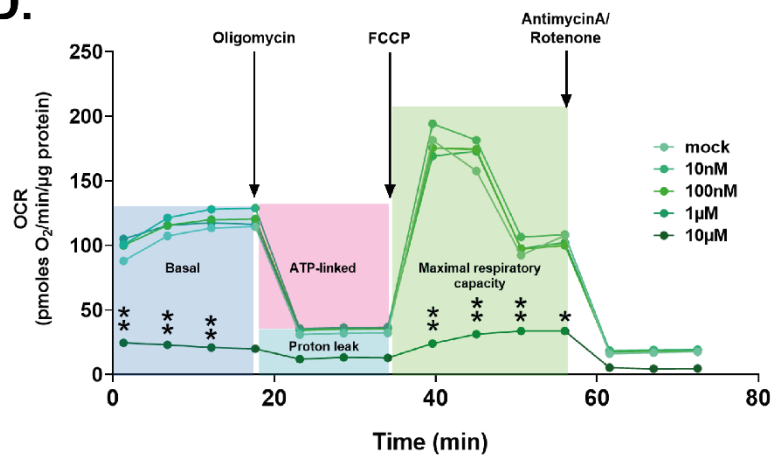

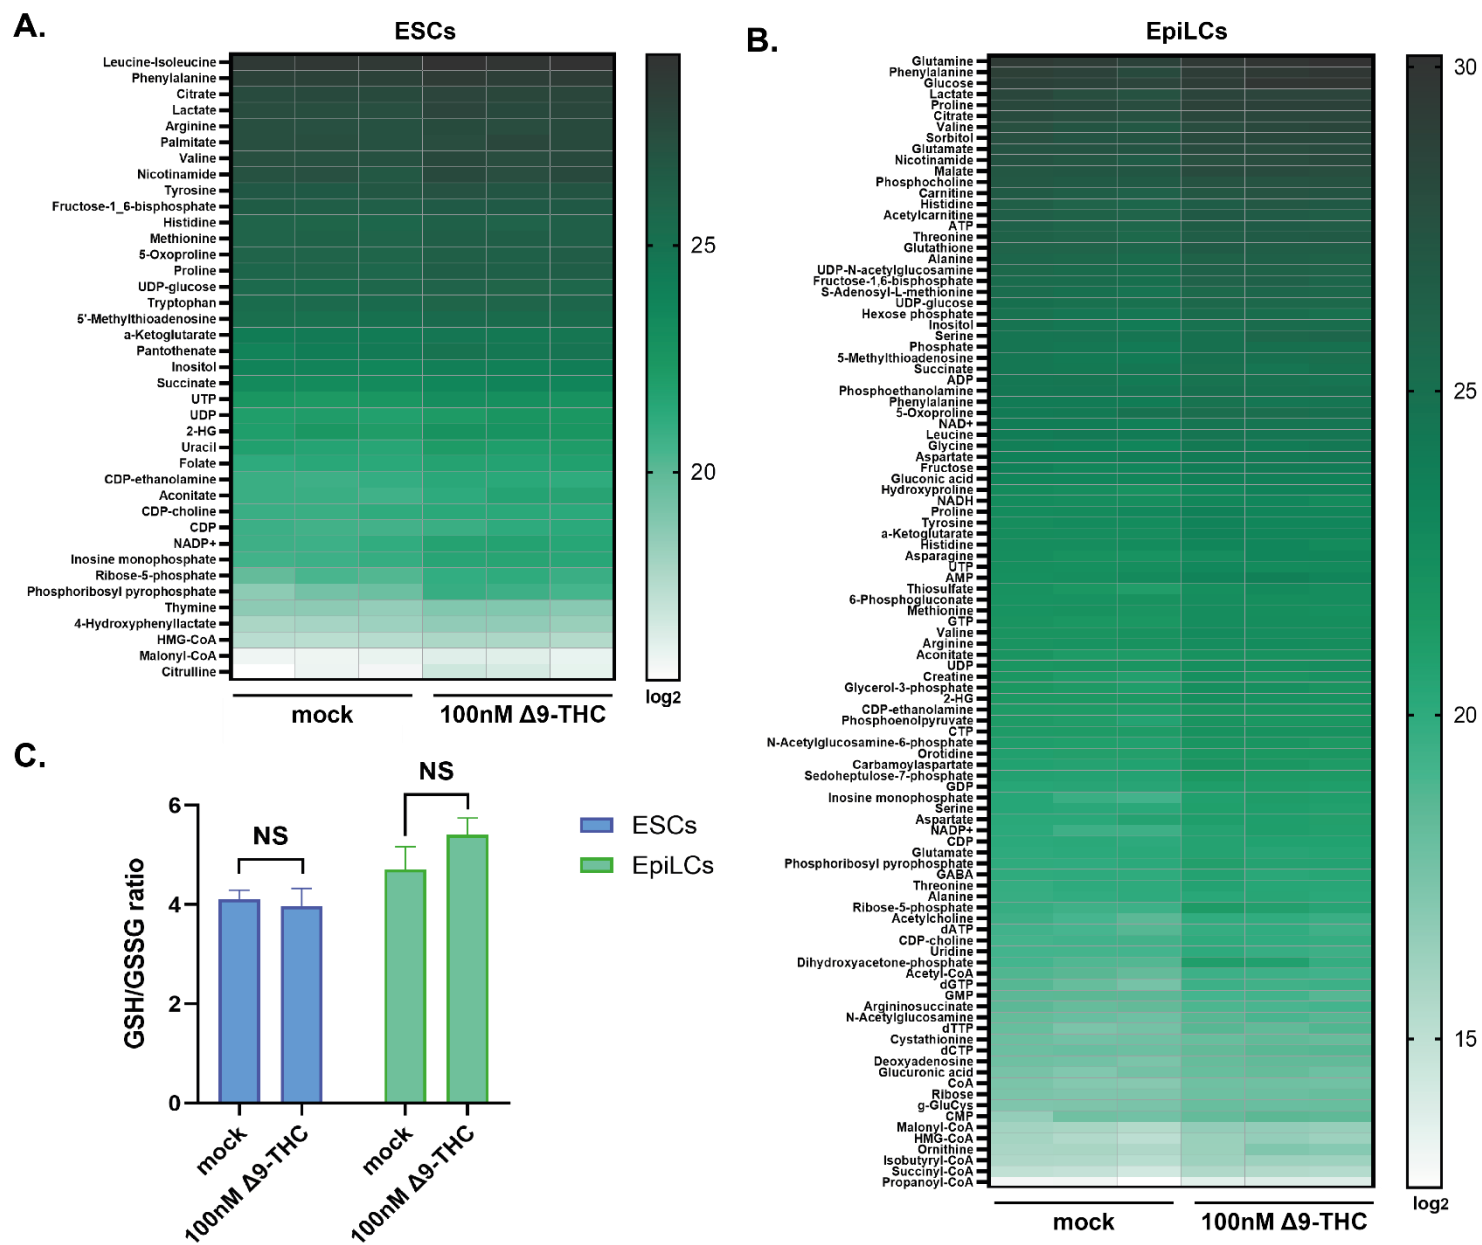

**A.**

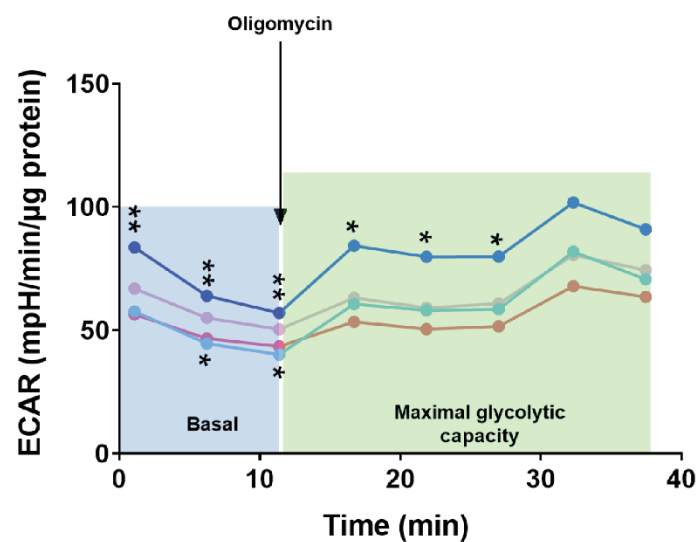

**B.**

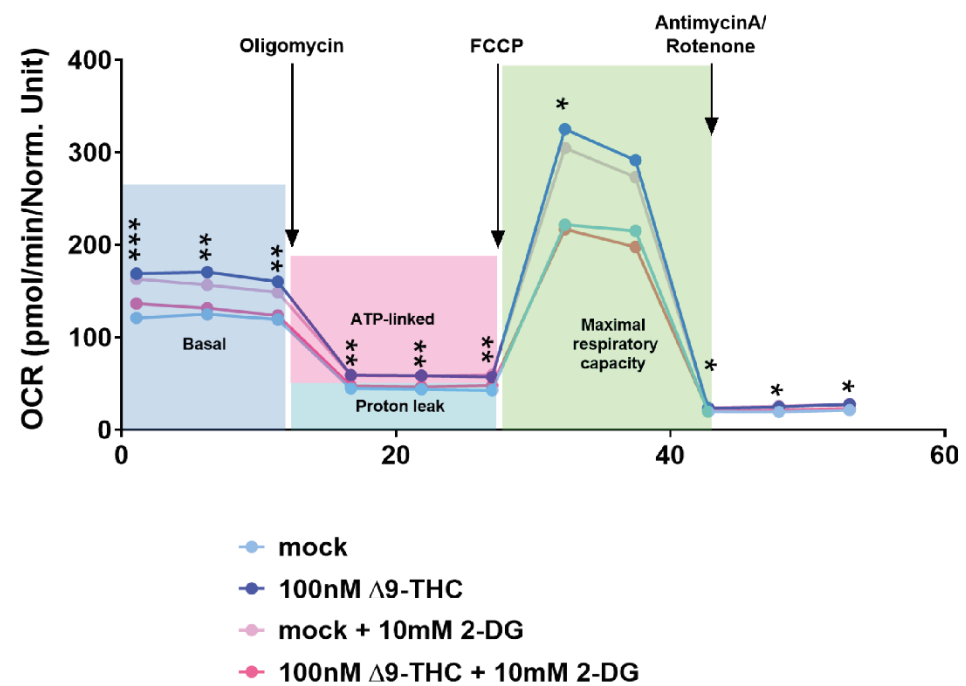

### ICM

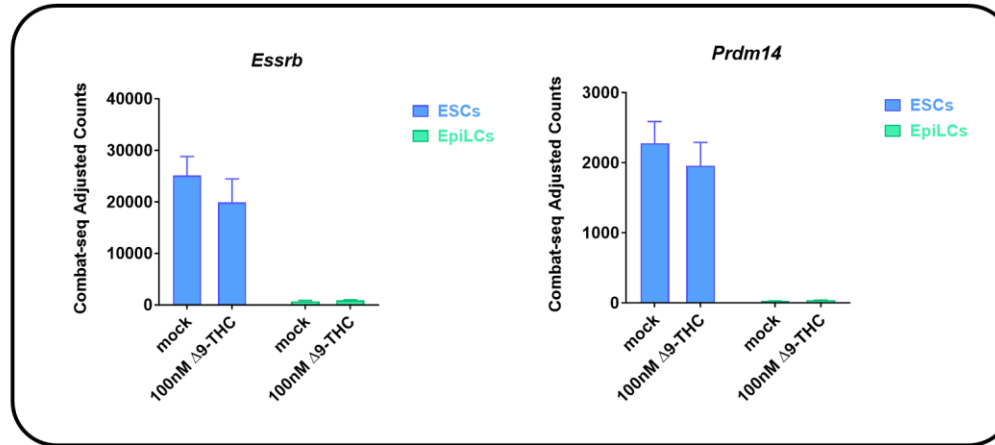

### Epiblast

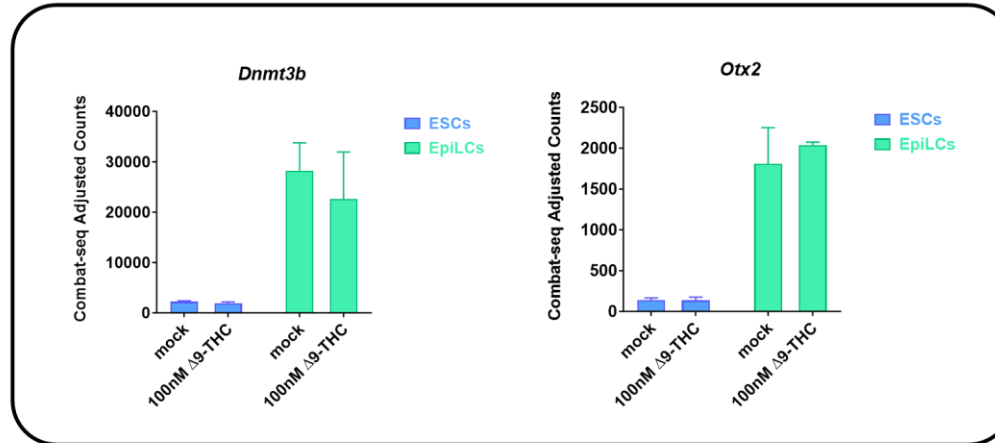

**DNA methylation**

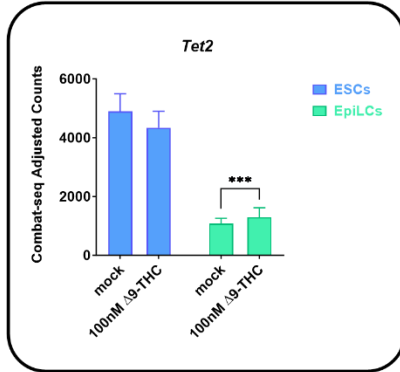

**Histone deacetylation**

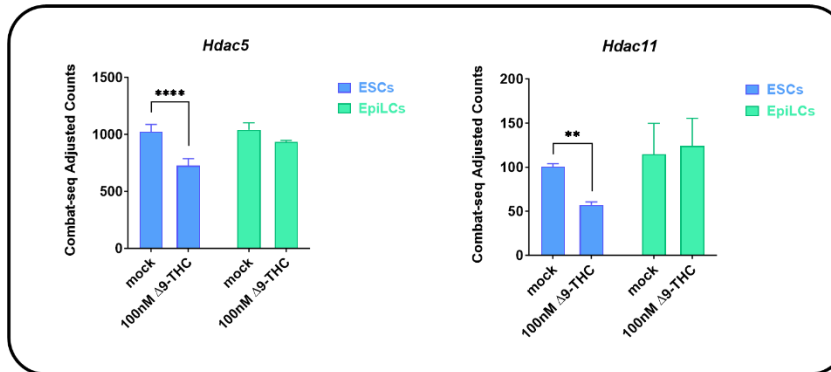

**Histone methylation**

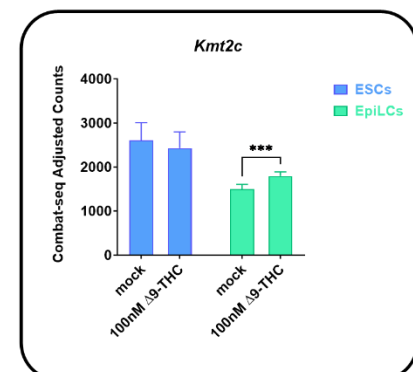

**Histone phosphorylation**

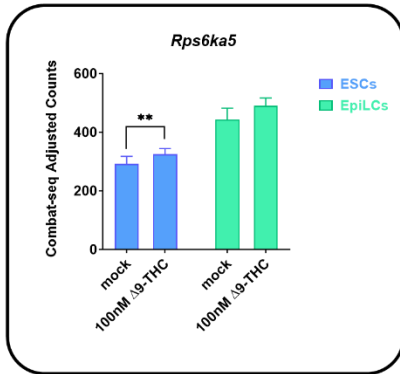

**Histone ubiquitination**

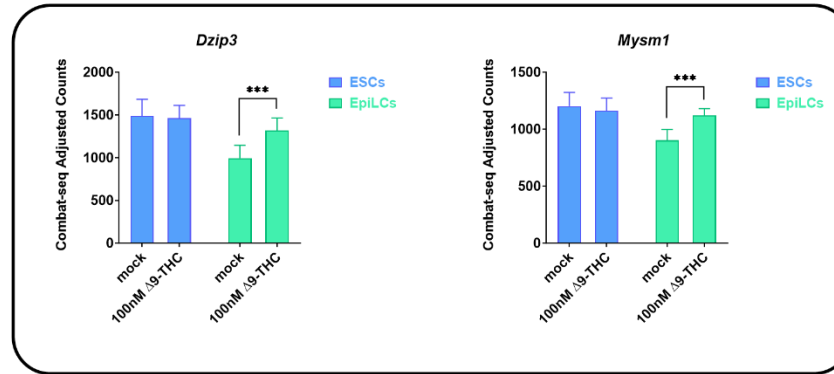

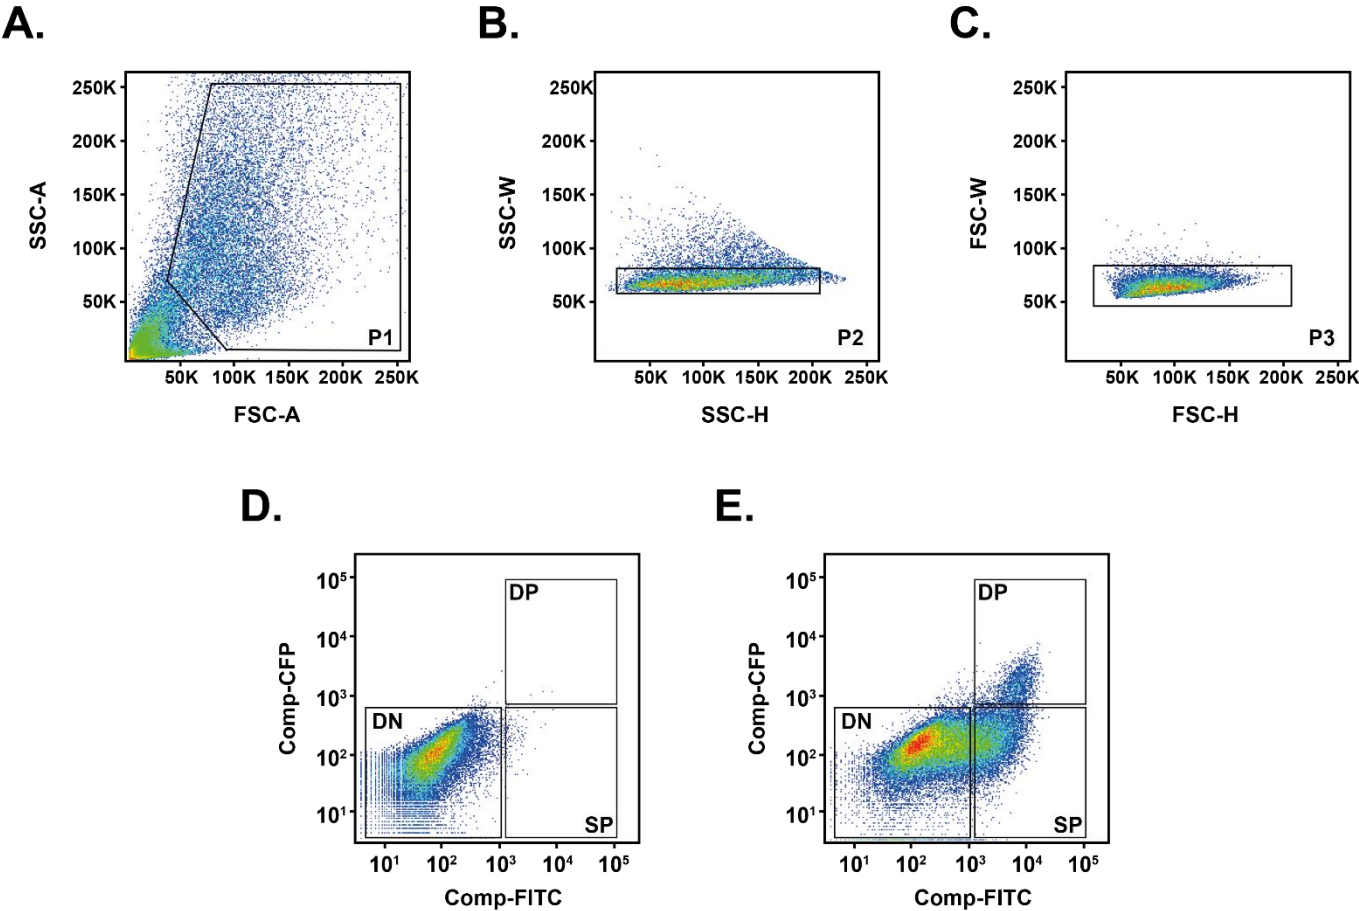

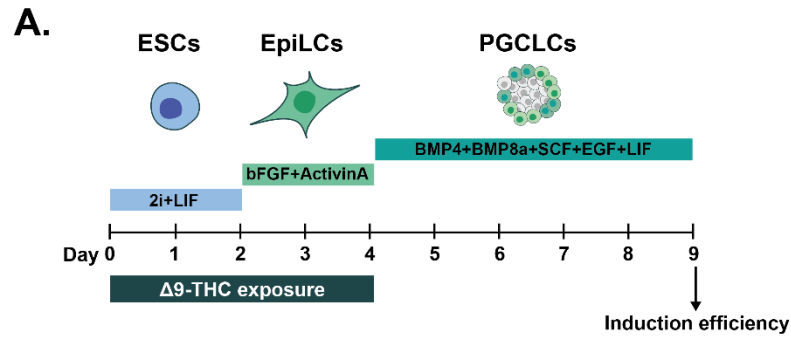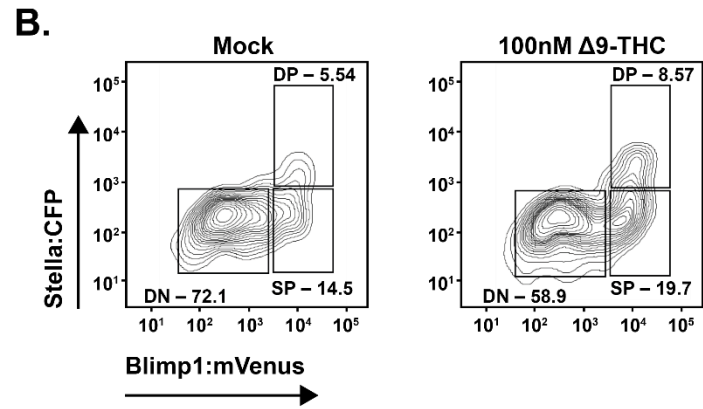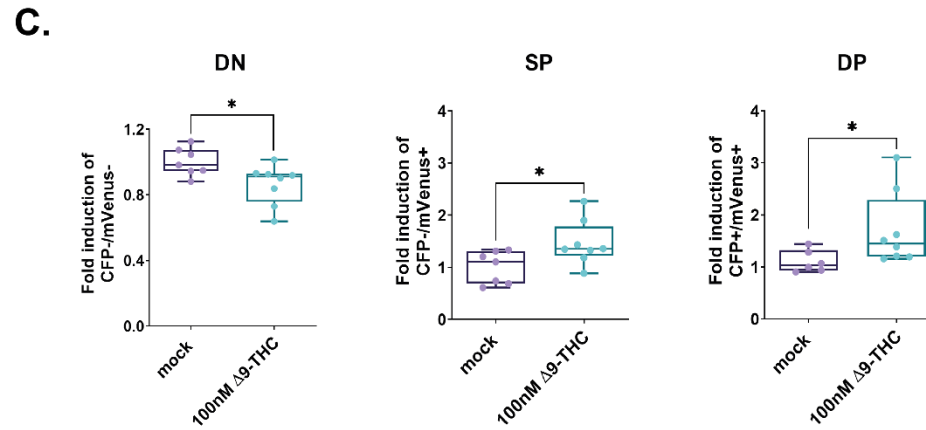

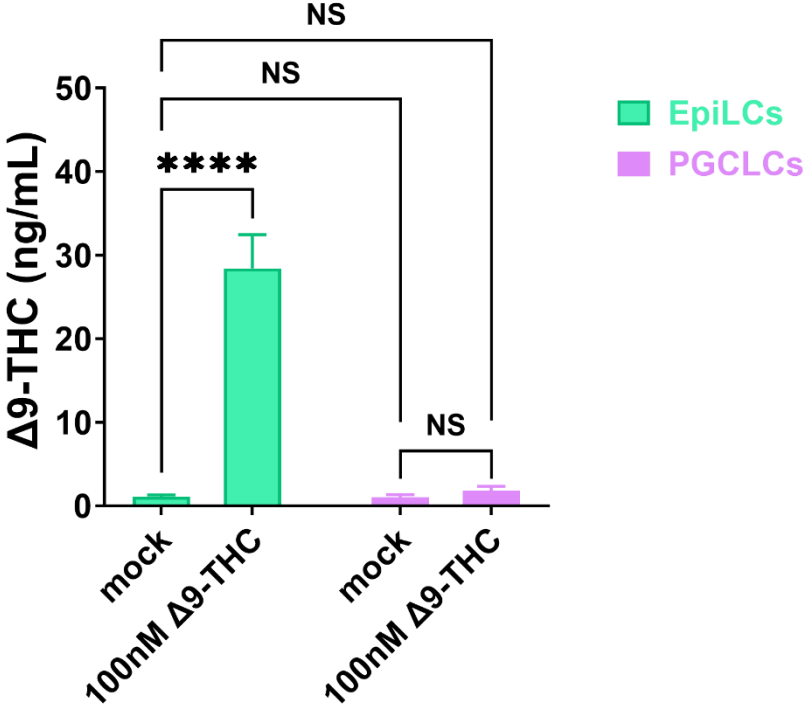

Supplement: NIHPP2023.03.13.531968V2-supplement-1.pdf [file NIHPP2023.03.13.531968V2-supplement-1.pdf]
